# Supplementary material
Source: HighWire-hosted journal article supplement (https://bmjopen.bmj.com/content/12/6/e060280)
Supplement: inline-supplementary-material-1 [file inline-supplementary-material-1.pdf]

## Summary of intervention development, underpinned by the theoretical framework - Behaviour Change Wheel

- **Select target behaviour:** Healthcare provider identifying and addressing needs post-TIA/minor stroke.
- **Identify what needs to change:**
  - Semi-structured interviews were conducted with healthcare providers and patients to identify influences on the target behaviour (results reported elsewhere). Transcripts were coded using the Theoretical Domains Framework (TDF).
- **Map TDF domains to “intervention functions”**
  - Four relevant intervention function identified: Education, Training, Environmental restructuring, Enablement.
- **Identify Behaviour Change Techniques (BCT):**
  - The BCT Taxonomy was used to identify appropriate BCT that mapped to relevant intervention functions.

The above process was informed by relevant literature; iterative feedback from patient partners and a multidisciplinary team (nurses, allied health professionals, GPs, consultants, researcher); and consideration of the APEASE criteria (Affordability, Practicality, Effectiveness and cost-effectiveness, Acceptability, Side-effects/safety, and Equity).

**eTable 1: Summary of the barriers/ enablers mapped to Theoretical Domain Framework domains, intervention functions, Behaviour Change Taxonomies and intervention components.**

| Barriers (B)/ Enablers (E)                                                                                  | TDF                                           | BCW intervention function | BCT                                                                                                                                                                                                                                      | SUPPORT TIA Intervention component  |
|-------------------------------------------------------------------------------------------------------------|-----------------------------------------------|---------------------------|------------------------------------------------------------------------------------------------------------------------------------------------------------------------------------------------------------------------------------------|-------------------------------------|
| HCPs' lack of knowledge of potential needs post-TIA/minor stroke (B).                                       | Knowledge                                     | Education/ Training       | <i>Information about health consequences</i>                                                                                                                                                                                             | Training for intervention providers |
| HCPs' perceived role in follow-up care influenced their approach to identifying and addressing needs (B/E). | Social professional role and identity<br>Goal |                           | <i>Information about social and environmental consequences</i><br><br><i>Information about emotional consequences</i><br><br><i>Instruction on how to perform the behaviour</i><br><br><i>Identity associated with changed behaviour</i> |                                     |

|                                                                                                                                |                                       |                                         |                                                    |                                                                                                                                                                |
|--------------------------------------------------------------------------------------------------------------------------------|---------------------------------------|-----------------------------------------|----------------------------------------------------|----------------------------------------------------------------------------------------------------------------------------------------------------------------|
| Lack of follow-up pathway following rapid hospital specialist review (B).                                                      | Environmental context and resources   | Environmental restructuring             | <i>Restructure physical environment</i>            | Structured nurse/AHP-led follow-up appointment                                                                                                                 |
| Time constraints (B).                                                                                                          | Social professional role and identity |                                         |                                                    |                                                                                                                                                                |
| Nurses and AHPs were more holistic in their approach to care (compared to doctors) and considered this part of their role (E). | Intentions                            |                                         |                                                    |                                                                                                                                                                |
| Checklists considered useful prompts to identify needs (E).                                                                    |                                       | Environmental restructuring/ Enablement | <i>Prompt/ cues</i>                                | Needs checklist completed by participants prior to the appointment                                                                                             |
| HCPs' lack of knowledge of support services and resources to support needs (B).                                                | Knowledge                             | Environmental restructuring/ Enablement | <i>Instruction on how to perform the behaviour</i> | Resources to support management of needs, including a website of resources and support services; list of local support services; and a self-management booklet |
| Directories of support services facilitated identification of support services (if up-to-date) (E).                            | Environmental context and resources   |                                         | <i>Adding objects to the environment</i>           |                                                                                                                                                                |
| Patients feel unsupported after hospital (B).                                                                                  | Social influences                     | Environmental restructuring/ Enablement | <i>Action planning</i>                             | Action plan                                                                                                                                                    |
| Difficult for patients to process and retain information (B).                                                                  |                                       |                                         | <i>Goal setting</i>                                |                                                                                                                                                                |
| Patients attempted to access information and support themselves, but found it overwhelming, confusing, contradictory (B).      |                                       |                                         | <i>Problem solving</i>                             |                                                                                                                                                                |
|                                                                                                                                |                                       |                                         | <i>Pharmacological support</i>                     |                                                                                                                                                                |
| Restricted communication between primary and secondary care (B).                                                               | Environmental context and resources   | Environmental restructuring/ Enablement | <i>Action planning</i>                             | Structured GP letter                                                                                                                                           |
| Variability in the speed and content of GP letters (B/E)                                                                       | Social influences                     |                                         | <i>Prompts/cues</i>                                |                                                                                                                                                                |
