# Supplementary material
Source: HighWire-hosted journal article supplement (https://bmjopen.bmj.com/content/12/6/e060280)
Supplement: inline-supplementary-material-3 [file inline-supplementary-material-3.pdf]

**eTable 2: Summary of proposed Patient Reported Outcome Measures (PROMs) for the main Randomised Controlled Trial.**

| Domain                         | PROM                            | Summary                                                                                                                                                                                                                                                                                                                                                                                                                                                                                                                       | Rationale                                                                                                                             |
|--------------------------------|---------------------------------|-------------------------------------------------------------------------------------------------------------------------------------------------------------------------------------------------------------------------------------------------------------------------------------------------------------------------------------------------------------------------------------------------------------------------------------------------------------------------------------------------------------------------------|---------------------------------------------------------------------------------------------------------------------------------------|
| Health related quality of life | PROMIS-Global Health 10         | <b>Questions:</b> 10<br><b>Scoring:</b> 5-point Likert + 10 point Likert pain question. Scored using item-level calibrations- use the Health Measures Scoring Service<br><b>MID:</b> none specified<br><b>Permissions:</b> publicly available for use                                                                                                                                                                                                                                                                         | Recommended by the International Consortium for Health Outcomes Measurement (2016) as part of a consensus stroke measure standard set |
| Health related quality of life | EQ-5D-5L                        | <b>Questions:</b> 5 + 1 VAS (20 cm)<br><b>Scoring:</b> 5-point Likert scale and VAS. Score = 0-1<br><b>MID:</b> for stroke: 0.08 to 0.12<br><b>Permissions:</b> licence agreement needed (€600)                                                                                                                                                                                                                                                                                                                               | Used to calculate Quality Adjusted Life Years for health economics analyses                                                           |
| Anxiety/depression             | HADS                            | <b>Questions:</b> 14<br><b>Scoring:</b> 4-point Likert Scale. 0-7 = Normal; 8-10 = Borderline abnormal; 11-21 = Abnormal<br><b>MID:</b> none specified<br><b>Permissions:</b> license agreement needed (0-1000 participants= £0.85 each)                                                                                                                                                                                                                                                                                      | Widely used in TIA/minor stroke research, comprehensive psychometric evaluation                                                       |
| Fatigue                        | FAS                             | <b>Questions:</b> 10<br><b>Scoring:</b> 5-point Likert Scale; Score = 10 (lowest fatigue) to 50 (highest fatigue). 10-21: no fatigue (normal), 22-50: substantial fatigue<br><b>MID:</b> at least 4 points or 10% change of the baseline value<br><b>Permissions:</b> must acknowledge the ild care foundation in the manuscript, FAS needs to be added as a keyword in the final publication, and PDF of the final publication must be send to the ild care foundation: <a href="mailto:info@ildcare.nl">info@ildcare.nl</a> | Systematic review of fatigue scales for stroke scales identified the FAS had the best test-retest reliability                         |
| Self-efficacy                  | PAM-13                          | <b>Questions:</b> 13<br><b>Scoring:</b> 5-point Likert Scale; Score 1-100: 4 Levels: Level 1 ≤47.0 (not believing activation is important), Level 2 47.1–55.1 (a lack of knowledge and confidence to take action), Level 3 55.2–67.0 (beginning to take action), level 4 ≥67.1 (taking action)<br><b>MID:</b> not specified<br><b>Permissions:</b> licence agreement NOT needed for feasibility studies                                                                                                                       | Used by NHS England                                                                                                                   |
| Medication adherence           | MARS-5                          | <b>Questions:</b> 6<br><b>Scoring:</b> 5-point Likert scale, score= 5 to 25 (higher scores= higher self-reported adherence)<br><b>MID:</b> not specified<br><b>Permissions:</b> Free access (subject to adequate citation) for Academic users                                                                                                                                                                                                                                                                                 | Validated in stroke patients, widely used                                                                                             |
| Satisfaction with care         | Satisfaction with care question | Not applicable- non-validated bespoke question                                                                                                                                                                                                                                                                                                                                                                                                                                                                                |                                                                                                                                       |

EQ-5D-5L: 5-level EuroQol 5-Dimensions; FAS: Fatigue Assessment Scale; HADS: Hospital Anxiety and Depression Scale; MARS-5: Medication adherence: Medication Adherence Rating Scale -5; MID: Minimally Important Difference; NHS: National Health Service; PAM-13: Patient Activation Measure-13; PDF: Portable Document Format; TIA: Transient Ischaemic Attack; VAS: Visual Analogue Scale
